# Supplementary material
Source: Springer Nature journal article supplement (https://www.springermedizin.de/resource/supplementary/12885_2012_3537_MOESM3_ESM.pdf/9463996)

a. Patients aged 65 years old or older

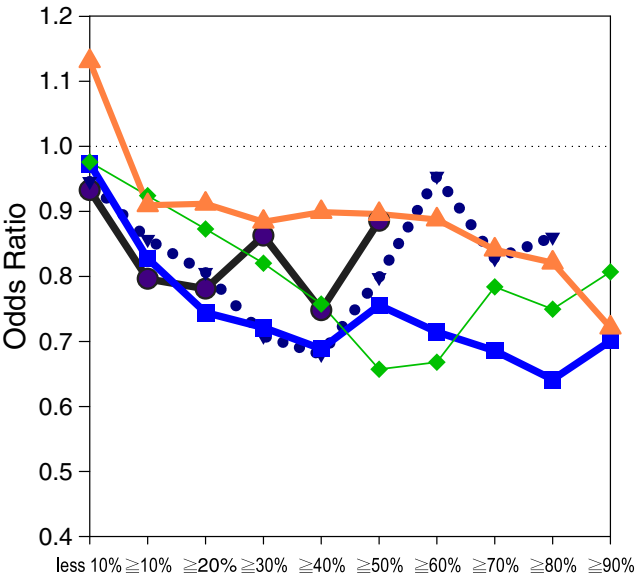

b. Patients aged less than 65 years old

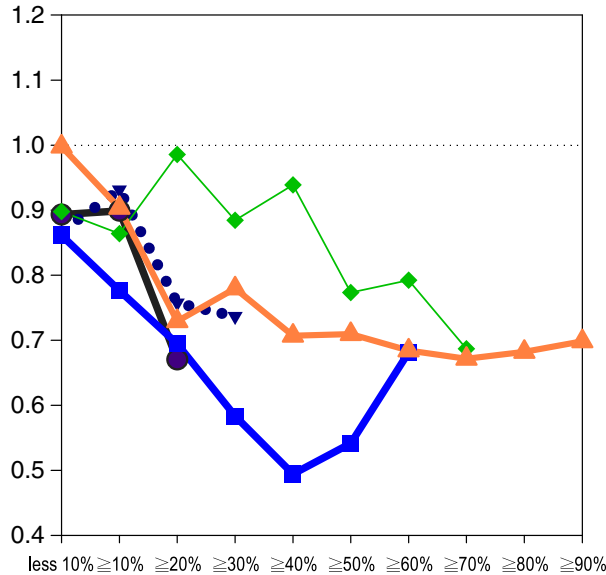

c. Male patients

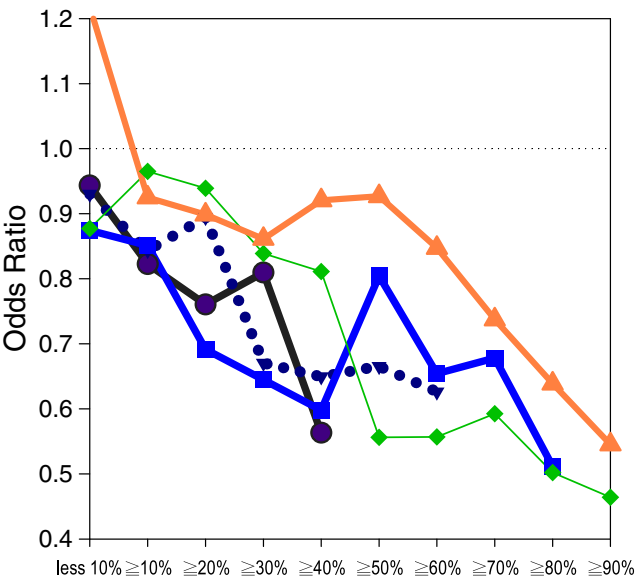

d. Female patients

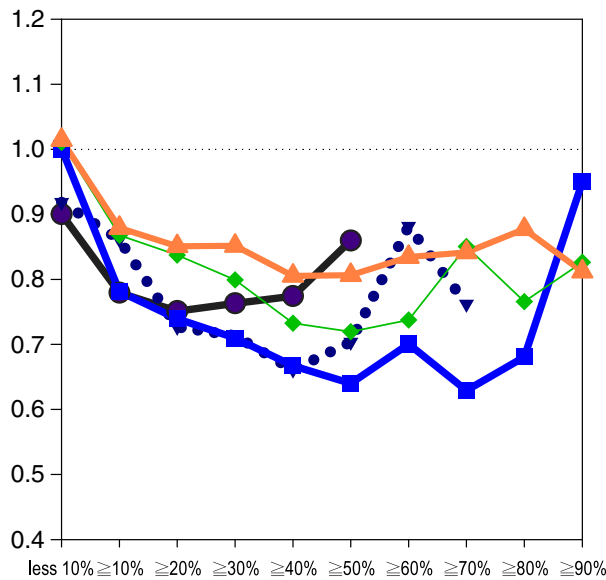

Medication possession ratio (MPR)

Medication possession ratio (MPR)

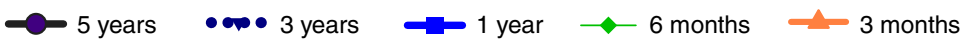

Supplement: MOESM3 [file 9463996]
